# Supplementary material
Source: Research Square preprint supplement (doi:10.21203/rs.3.rs-10012079/v1)

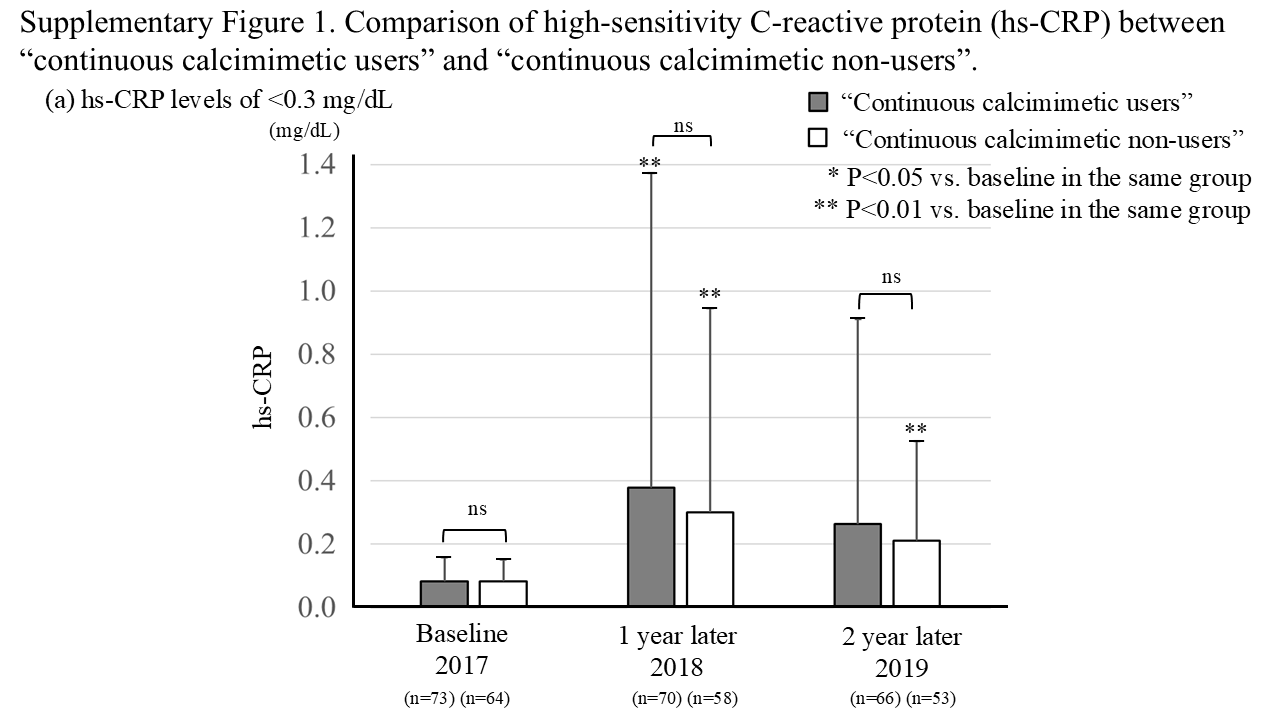


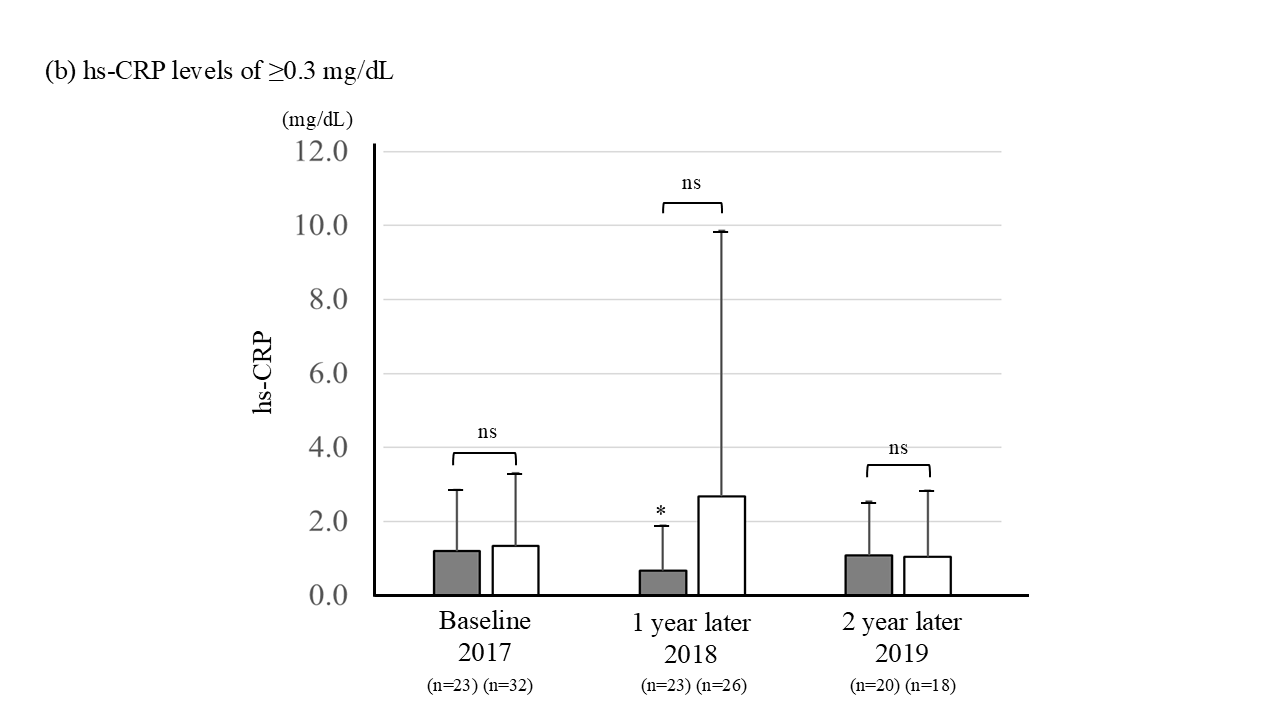


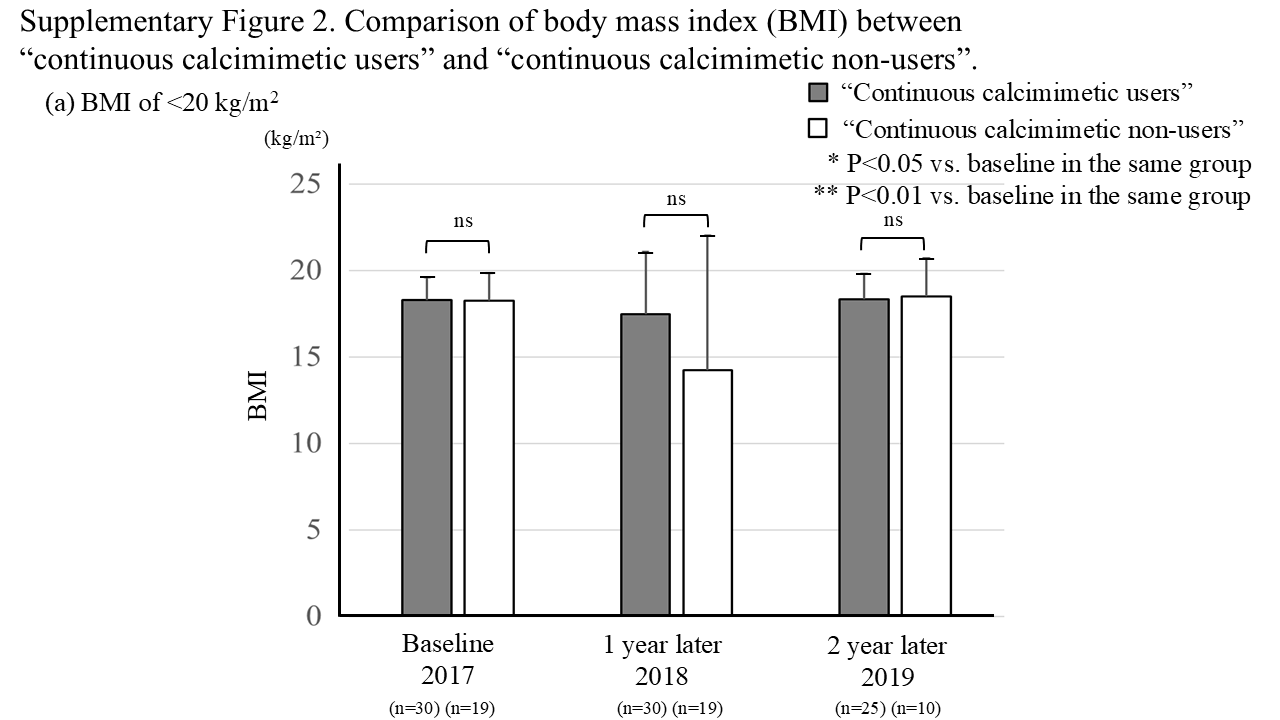


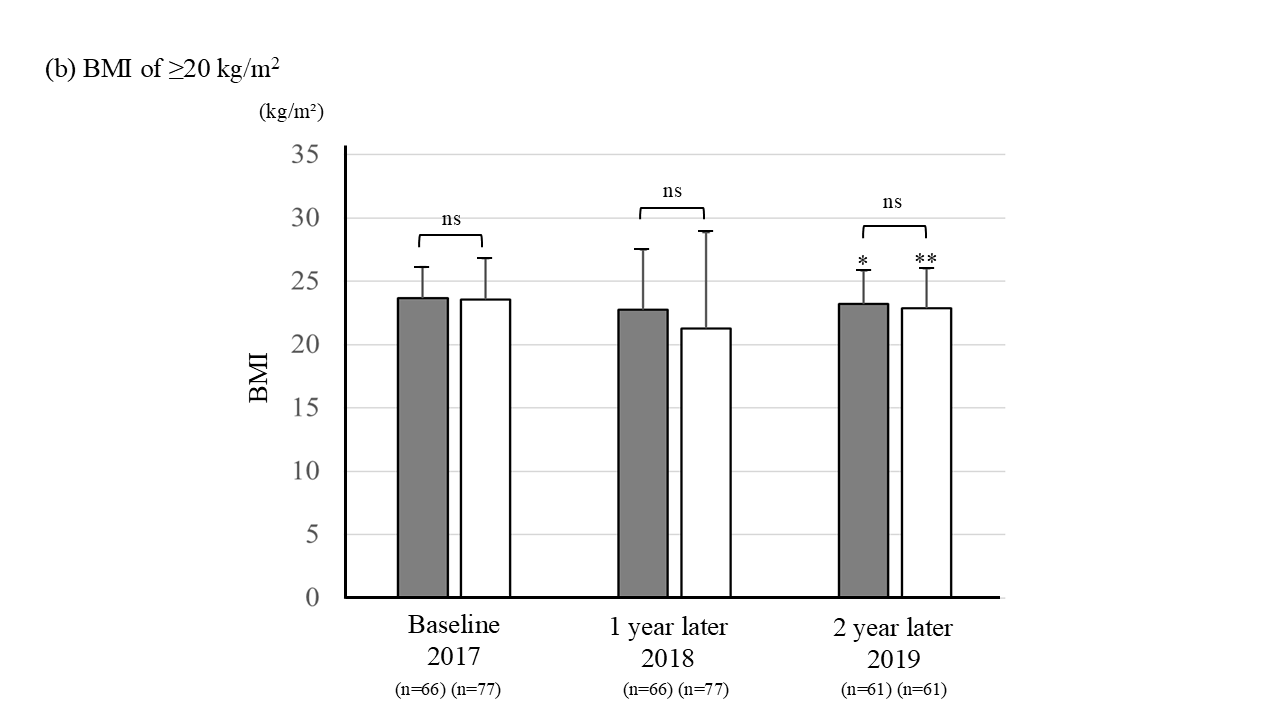


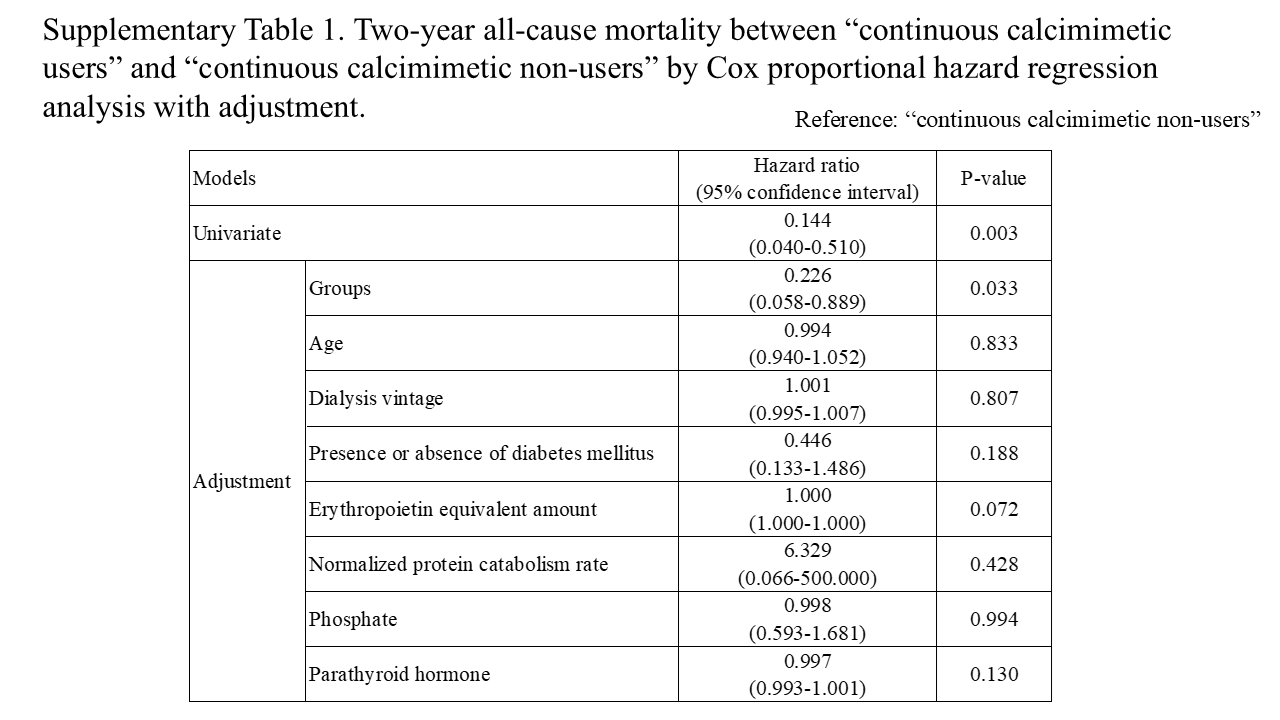


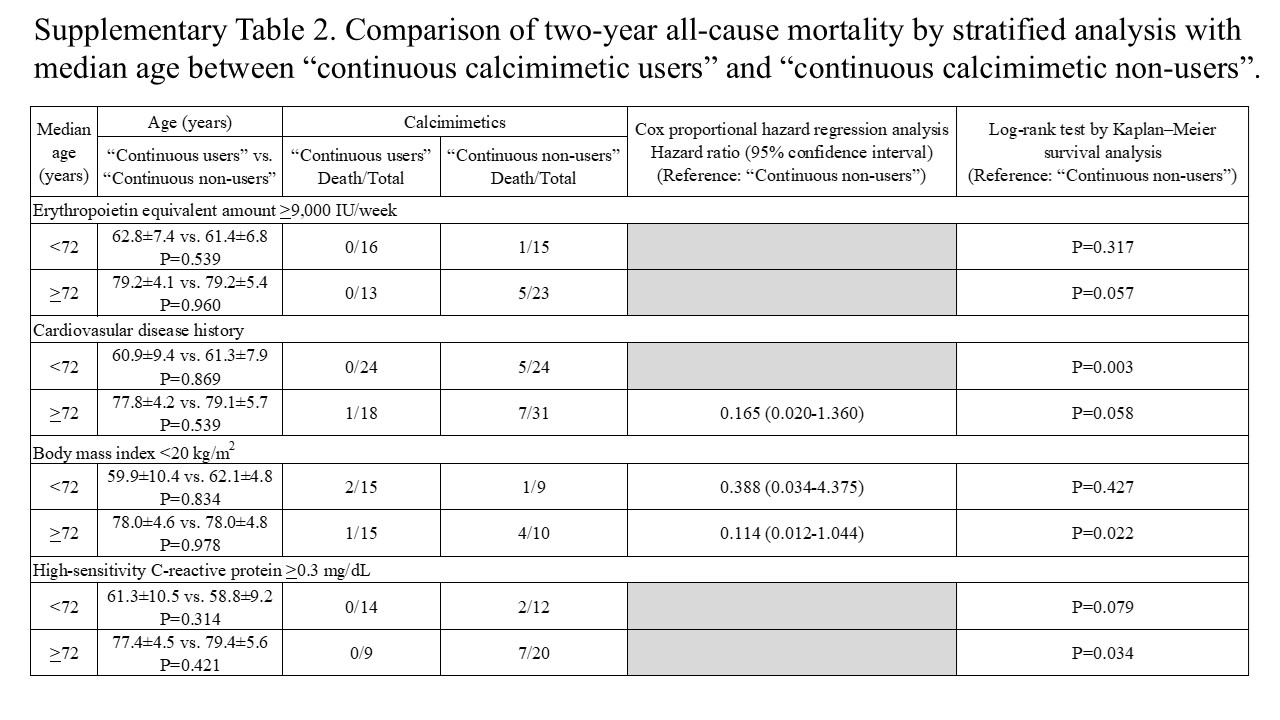

Supplement: Supplementary file 1 [file 8b01d0498a7ca997ac472222.docx]
